# Supplementary material for: In Utero Exposure to Diethylstilbestrol and Blood DNA Methylation in Women Ages 40–59 Years from the Sister Study
Source: PubMed Central journal article supplement (PMC4353728; doi:10.1371/journal.pone.0118757), 2015-03-09
Supplement: pone.0118757.s003.pdf [file pone.0118757.s003.pdf]

**Table S2.** Pearson's correlation coefficients between duplicates using methylation beta values for Infinium I and Infinium II probes

| <b>Duplicates id</b> | <b>Infinium I</b><br>correlation coefficients | <b>Infinium II</b><br>correlation coefficients |
|----------------------|-----------------------------------------------|------------------------------------------------|
| 1                    | 0.998689                                      | 0.998351                                       |
| 2                    | 0.998613                                      | 0.997843                                       |
| 3                    | 0.998898                                      | 0.998502                                       |
| 4                    | 0.998827                                      | 0.99826                                        |
| 5                    | 0.998564                                      | 0.997701                                       |
| 6                    | 0.998794                                      | 0.998453                                       |
| 7                    | 0.998896                                      | 0.998215                                       |
| 8                    | 0.998399                                      | 0.99781                                        |
| 9                    | 0.998351                                      | 0.997148                                       |
