# Supplementary material for: In Utero Exposure to Diethylstilbestrol and Blood DNA Methylation in Women Ages 40–59 Years from the Sister Study
Source: PLOS journal article supplement (doi:10.1371/journal.pone.0118757), 2015-03-09

**Figure S1:**

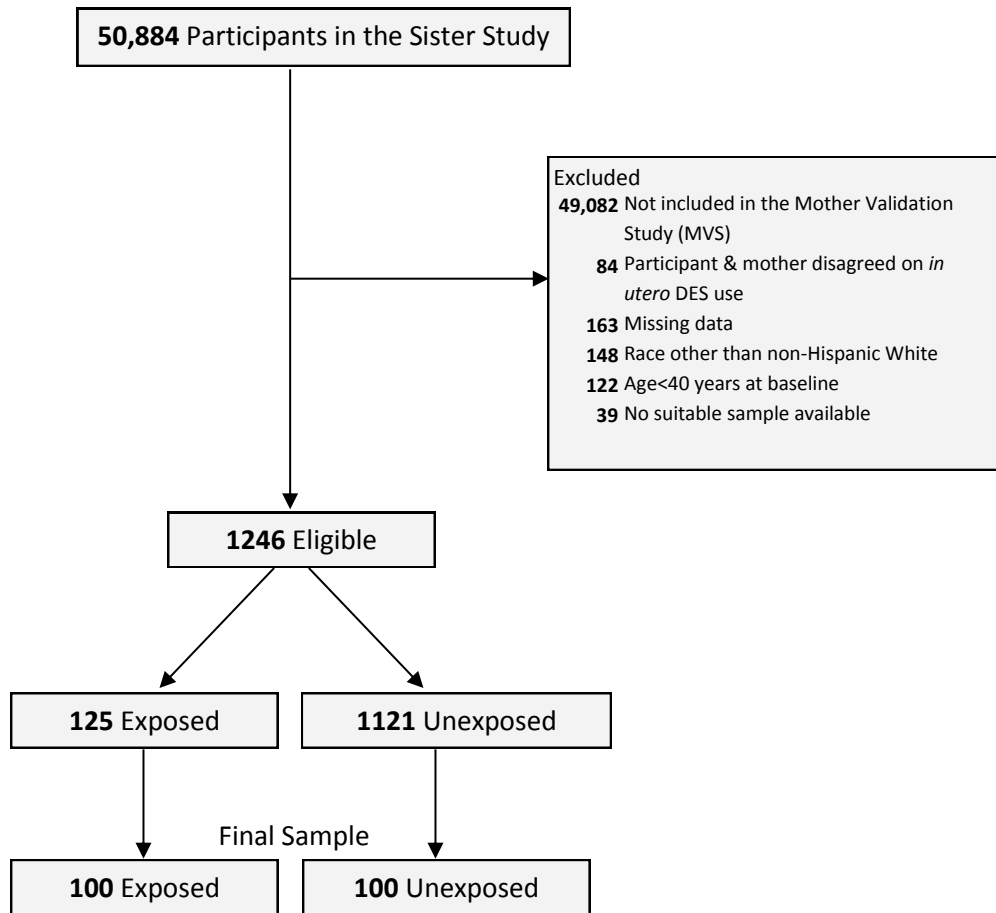

Supplement: S1 (10.1371/journal.pone.0118757.s001) [file journal.pone.0118757.s001]
