# Supplementary material for: In Utero Exposure to Diethylstilbestrol and Blood DNA Methylation in Women Ages 40–59 Years from the Sister Study
Source: PLOS journal article supplement (doi:10.1371/journal.pone.0118757), 2015-03-09
Supplement: S2 (10.1371/journal.pone.0118757.s002) [file journal.pone.0118757.s002]

**Table S1.** Comparison of mother and daughter reports of *in utero* DES exposure between participants in the Mother’s Validation Study and The Sister Study.

| <b>Mother’s report:</b><br>When pregnant with your daughter did you take DES (diethylstilbestrol)?. | <b>Daughter’s report:</b><br>During her pregnancy with you, did your mother take DES (diethylstilbestrol)?. |                                   | TOTAL             |
|-----------------------------------------------------------------------------------------------------|-------------------------------------------------------------------------------------------------------------|-----------------------------------|-------------------|
|                                                                                                     | <b>Definitely/Probably<br/>YES</b>                                                                          | <b>Definitely/Probably<br/>NO</b> |                   |
| <b>YES</b>                                                                                          | 139                                                                                                         | <b>6</b>                          | 145               |
| <b>NO</b>                                                                                           | <b>78</b>                                                                                                   | 1416                              | 1494              |
| TOTAL                                                                                               | 217                                                                                                         | 1422                              | 1639 <sup>a</sup> |

<sup>a</sup> Missing data: 163
